# Supplementary material
Source: Frontiers journal article supplement (https://www.frontiersin.org/articles/133186)
Supplement: Table_1.DOCX [file Table_1.DOCX]

**Supplementary Table 1.** Differentially expressed proteins in *Uncaria tomentosa* root cultures elicited with BSO-JA and identified by mass spectrometry.
